# Supplementary material for: Tunable electronic properties of the novel g-ZnO/1T-TiS2 vdW heterostructure by electric field and strain: crossovers in bandgap and band alignment types
Source: Royal Society of Chemistry journal article supplement (doi:10.1039/d0cp00524j), 2020-01-01
Supplement: d0cp00524j1.pdf [file d0cp00524j1.pdf]

## Electronic supplementary information for

# "Tunable electronic properties of the novel g-ZnO/1T-TiS<sub>2</sub> vdW heterostructure by electric field and strain: crossovers in bandgap and band alignment types"

Kourosh Rahimi\*

Condensed Matter Group, Department of Basic Sciences, Tarbiat Modares University, Jalal-Ale-Ahmad Avenue, Tehran, Iran

\* Corresponding author: kourosh.e.rahimi@gmail.com

The optimized unit cell parameters (PRIMVEC) and the atomic positions (PRIMCOORD) of the six stacking patterns considered in this work as written in .xsf format are given below:

| Stacking pattern                                                                    | xsf file content                                                                                                                                                                                                                                                                                                                                                                                                   |
|-------------------------------------------------------------------------------------|--------------------------------------------------------------------------------------------------------------------------------------------------------------------------------------------------------------------------------------------------------------------------------------------------------------------------------------------------------------------------------------------------------------------|
| 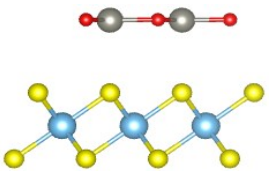  | <pre> CRYSTAL PRIMVEC   3.3895887331  -0.0000000000  0.0000000000  -1.6947960633  2.9354699484  0.0000000000   0.0000000000  0.0000000000  19.9999923284 PRIMCOORD 5 1 S  -0.0000000006  1.9569799711  11.3723042960 Ti  0.0000000000  0.0000000000  9.9185981571 S   1.6947943705  0.9784899841  8.4666766377 Zn  -0.0000000006  1.9569799711  14.5612668605 O   1.6947943705  0.9784899841  14.5838066130 </pre> |
|  | <pre> CRYSTAL PRIMVEC   3.3885333690  -0.0000000000  0.0000000000  -1.6942666845  2.9345537158  0.0000000000   0.0000000000  0.0000000000  19.9999923284 PRIMCOORD 5 1 S  -0.0000000017  1.9563698778  11.3299184100 Ti  0.0000000000  0.0000000000  9.8759199913 S   1.6942660143  0.9781849375  8.4237540319 Zn  -0.0000000017  1.9563698778  14.6299641978 O   0.0000000000  0.0000000000  14.6430959134 </pre> |
|  | <pre> CRYSTAL PRIMVEC   3.3871318725  0.0000000000  0.0000000000  -1.6935642395  2.9333422528  0.0000000000   0.0000000000  0.0000000000  19.9999923284 PRIMCOORD 5 1 S  -0.0000000017  1.9555609983  11.3272406109 Ti  0.0000000000  0.0000000000  9.8708019530 S   1.6935655036  0.9777804977  8.4156825146 Zn  0.0000000000  0.0000000000  14.6418053738 O   1.6935655036  0.9777804977  14.6471220921 </pre>   |

|                                                                                     |                                                                                                                                                                                                                                                                                                                                                                                                                            |
|-------------------------------------------------------------------------------------|----------------------------------------------------------------------------------------------------------------------------------------------------------------------------------------------------------------------------------------------------------------------------------------------------------------------------------------------------------------------------------------------------------------------------|
| 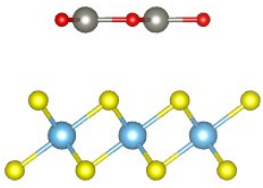   | <pre> CRYSTAL PRIMVEC   3.3883060075  -0.0000000000  0.0000000000  -1.6941547005  2.9343602890  0.0000000000   0.0000000000  0.0000000000  19.9999923284 PRIMCOORD 5 1 S   -0.0000000028  1.9562395737  11.3104529965 Ti   0.0000000000  0.0000000000   9.8547123983 S    1.6941531661  0.9781197854   8.4001651397 Zn    1.6941531661  0.9781197854  14.6664730457 O     0.0000000000  0.0000000000  14.6708489642 </pre> |
|    | <pre> CRYSTAL PRIMVEC   3.3854249652  -0.0000000000  0.0000000000  -1.6927124826  2.9318627069  0.0000000000   0.0000000000  0.0000000000  19.9999923284 PRIMCOORD 5 1 S   -0.0000000017  1.9545758086  11.2244498049 Ti   0.0000000000  0.0000000000   9.7690277466 S    1.6927123044  0.9772879028   8.3134047884 Zn    0.0000000000  0.0000000000  14.7952578831 O   -0.0000000017  1.9545758086  14.8005123213 </pre>  |
|  | <pre> CRYSTAL PRIMVEC   3.3855742772  0.0000000000  0.0000000000  -1.6927871386  2.9319916581  0.0000000000   0.0000000000  0.0000000000  19.9999923284 PRIMCOORD 5 1 S   -0.0000000028  1.9546617919  11.2171085474 Ti   0.0000000000  0.0000000000   9.7624379888 S    1.6927867681  0.9773308945   8.3073976304 Zn    1.6927867681  0.9773308945  14.8041674201 O   -0.0000000028  1.9546617919  14.8115409577 </pre>   |

A typical input for variable-cell relaxation for quantum espresso is given below:

```

&CONTROL
    title = '1T-TiS2-ZnO' ,
    calculation = 'vc-relax' ,
    restart_mode = 'from_scratch' ,
    wf_collect = .true. ,
    outdir = 'tmp' ,
    wfcdir = 'wfc' ,
    pseudo_dir = 'pseudo' ,
    verbosity = 'high' ,
    nstep = 200 ,
/
&SYSTEM
    ibrav = 4,
    A = 3.393455 ,
    C = 20 ,
    nat = 5,
    ntyp = 4,
    ecutwfc = 8.0000000000d+01 ,
    nbnd = 33,
    input_dft = "vdw-df" ,
    occupations = 'fixed' ,

```

```

/
&ELECTRONS
      electron_maxstep = 200,
      conv_thr = 1.d-10 ,
      mixing_beta = 0.4 ,
/
&IONS
/
&CELL
      cell_dofree = '2Dxy' ,
/
ATOMIC_SPECIES
S 32.06600 S_ONCV_PBE_sr.upf
Ti 47.86700 Ti_ONCV_PBE_sr.upf
Zn 65.39000 Zn_ONCV_PBE_sr.upf
O 15.99940 O_ONCV_PBE_sr.upf
ATOMIC_POSITIONS crystal
S 0.333333333 0.666666667 0.572566801
Ti 0.000000000 0.000000000 0.500000000
S 0.666666667 0.333333333 0.427433199
Zn 0.333333333 0.666666667 0.722566801
O 0.666666667 0.333333333 0.722566801
K_POINTS automatic
12 12 1 0 0 0

```

A typical input for Wannier90 to calculate band structures is given below:

```

num_wann      = 33
num_bands     = 33
dis_num_iter  = 400
num_iter      = 400
conv_tol      = 1.0E-10
dis_conv_tol  = 1.0E-10

begin atoms_frac
S 0.333333333 0.666666667 0.568615403
Ti 0.000000000 0.000000000 0.495930072
S 0.666666667 0.333333333 0.423333972
Zn 0.333333333 0.666666667 0.728063584
O 0.666666667 0.333333333 0.729190572
end atoms_frac

auto_projections = .true.
fermi_energy = -0.6169
bands_plot = .true.
wannier_plot = true

begin unit_cell_cart
bohr
6.4053965304 0 0
-3.202698262 5.5472361185 0
0 0 37.7945226298
end_unit_cell_cart

begin kpoint_path
G 0.000000000 0.000000000 0.000000000 M 0.500000000 0.000000000 0.000000000
M 0.500000000 0.000000000 0.000000000 K 0.333330000 0.333330000 0.000000000
K 0.333330000 0.333330000 0.000000000 G 0.000000000 0.000000000 0.000000000
end kpoint_path

mp_grid : 12 12 1

begin kpoints
0.0000000000000000 0.0000000000000000 0.0000000000000000 0.0069444444
0.0000000000000000 0.0833333333333333 0.0000000000000000 0.0069444444

```





|                     |                    |                   |               |
|---------------------|--------------------|-------------------|---------------|
| -0.0833333333333333 | 0.166666666666667  | 0.000000000000000 | 0.00694444444 |
| -0.0833333333333333 | 0.250000000000000  | 0.000000000000000 | 0.00694444444 |
| -0.0833333333333333 | 0.333333333333333  | 0.000000000000000 | 0.00694444444 |
| -0.0833333333333333 | 0.416666666666667  | 0.000000000000000 | 0.00694444444 |
| -0.0833333333333333 | 0.500000000000000  | 0.000000000000000 | 0.00694444444 |
| -0.0833333333333333 | -0.416666666666667 | 0.000000000000000 | 0.00694444444 |
| -0.0833333333333333 | -0.333333333333333 | 0.000000000000000 | 0.00694444444 |
| -0.0833333333333333 | -0.250000000000000 | 0.000000000000000 | 0.00694444444 |
| -0.0833333333333333 | -0.166666666666667 | 0.000000000000000 | 0.00694444444 |
| -0.0833333333333333 | -0.083333333333333 | 0.000000000000000 | 0.00694444444 |

end kpoints
